# Supplementary material
Source: publisher figshare collection journal article supplement (https://acs.figshare.com/ndownloader/files/16949378)
Supplement: Supplementary file 1 [file 16949378]

**Isolation and Identification of Aryl Hydrocarbon Receptor Modulators in White Button  
Mushrooms (*Agaricus bisporus*)**

Yuan Tian<sup>†,‡,#</sup>, Wei Gui<sup>†,#</sup>, Philip B. Smith<sup>§</sup>, Imhoi Koo<sup>†</sup>, Iain A. Murray<sup>†</sup>, Margherita T.

Cantorna<sup>†</sup>, Gary H. Perdew<sup>†</sup>, and Andrew D. Patterson<sup>†,\*</sup>

<sup>†</sup>Department of Veterinary and Biomedical Sciences, The Pennsylvania State University,  
University Park, Pennsylvania 16802, United States

<sup>‡</sup>CAS Key Laboratory of Magnetic Resonance in Biological Systems, State Key Laboratory of  
Magnetic Resonance and Atomic and Molecular Physics, National Centre for Magnetic Resonance  
in Wuhan, Wuhan Institute of Physics and Mathematics, University of Chinese Academy of  
Sciences, Wuhan, 430071, P. R. China

<sup>§</sup>Huck Institutes of the Life Sciences, The Pennsylvania State University, University Park,  
Pennsylvania 16802, United States

<sup>#</sup>These authors contributed equally to this work

<sup>\*</sup>To whom correspondence should be addressed. Email: [adp117@psu.edu](mailto:adp117@psu.edu). Address: 322 Life  
Science Bldg, University Park, PA 16802, Phone: 814-867-4565

**Table S1.** mRNA gene-targeted primers used in this study

| Gene                                     | Abbreviation  | Sequence (5'-3')                                                   |
|------------------------------------------|---------------|--------------------------------------------------------------------|
| Ribosomal protein L13                    | <i>Rpl13</i>  | TAC CAG AAA GTT TGC TTA CCT GGG<br>TGC CTG TTT CCG TAA CCT CAA G   |
| Glyceraldehyde-3-phosphate dehydrogenase | <i>Gapdh</i>  | CCT CGT CCC GTA GAC AAA ATG<br>TGA AGG GGT CGT TGA TGG C           |
| Cytochrome P450, family 1, member A1     | <i>CYP1A1</i> | CTC TTC CCT GGA TGC CTT GAA<br>GGA TGT GGC CCT TCT CAA ATG         |
| Cytochrome P450, family 1, member A2     | <i>CYP1A2</i> | GCC CCT GCC CTT CAG TGG TAC AG<br>AGG AGT GGA GCC GAT GCG GA       |
| Aryl-hydrocarbon receptor repressor      | <i>AHRR</i>   | GTG CGA ATC GGA ACT GCA TGG AAA<br>TCA GTC TGT TCC CTG AGC ACC AAA |

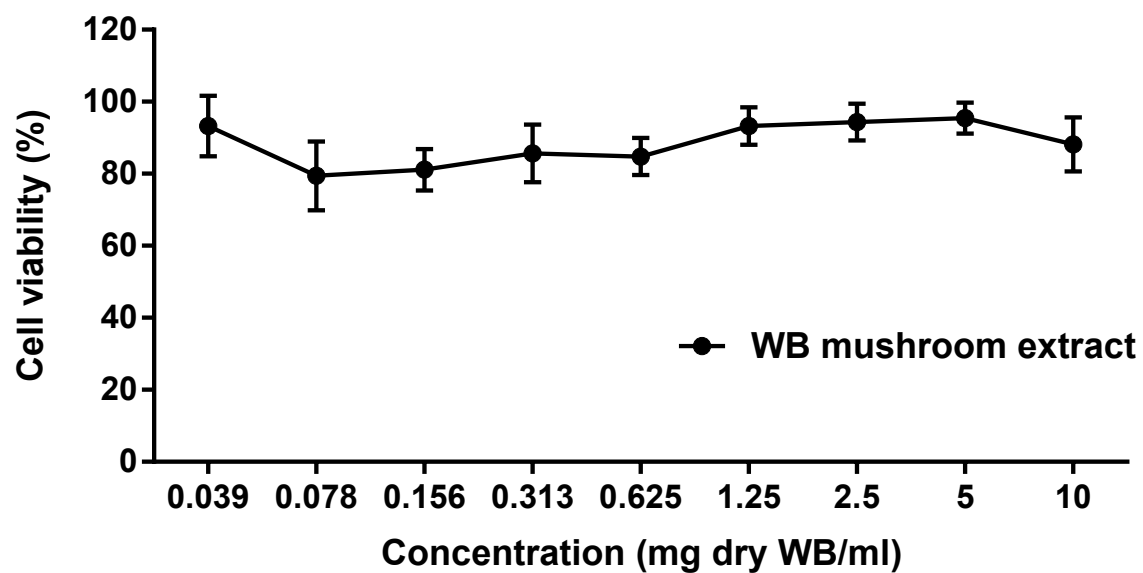

Figure S1. Percent viability of HepG2 40/6 cells measured by MTT assay after exposure for 5 hours to various dilutions of WB mushroom extract. Values are the mean  $\pm$  S.D. of  $n = 3$  per group.

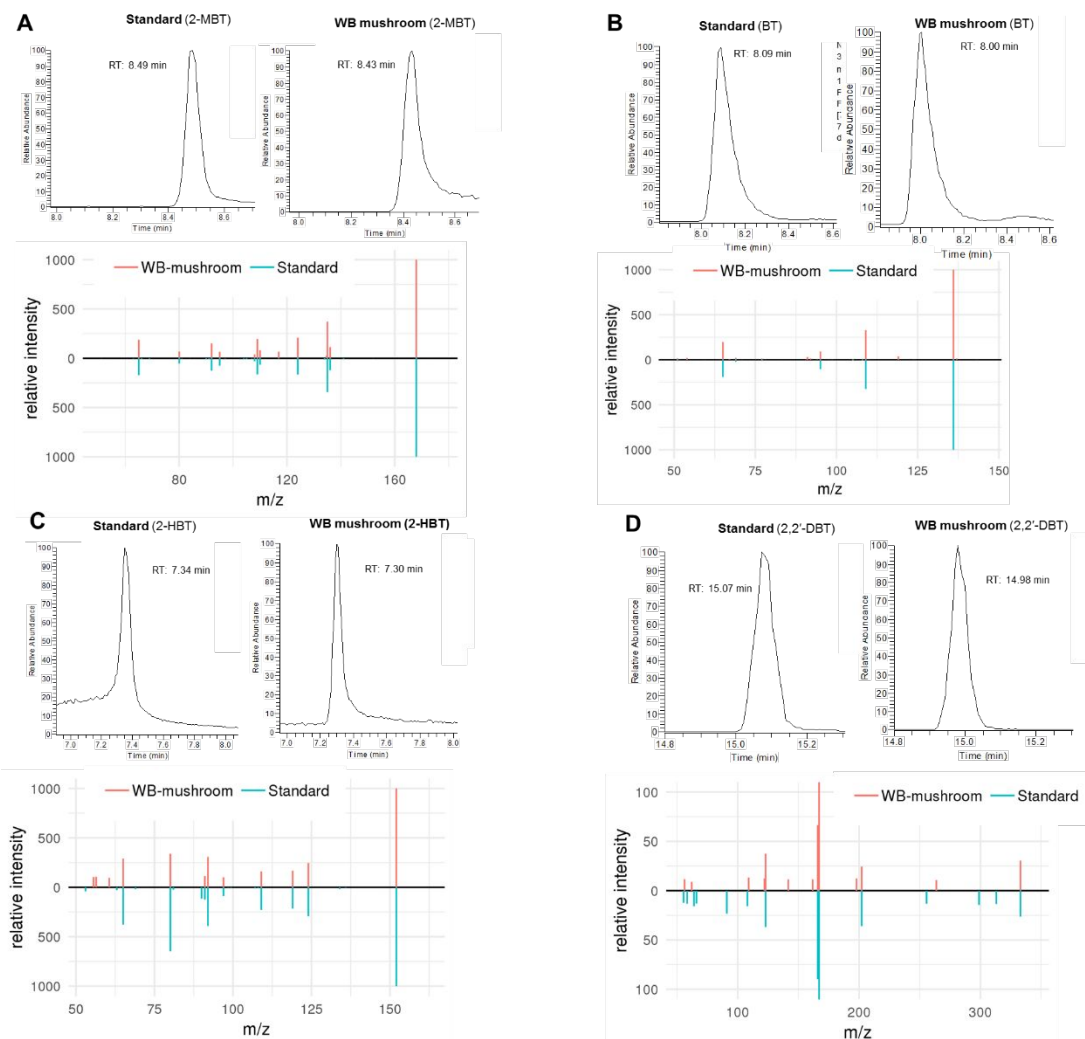

Figure S2. UHPLC/MS-MS chromatograms of standard (A) 2-mercaptobenzothiazole (2-MBT), (B) benzothiazole (BT), (C) 2-hydrobenzothiazole (2-HBT), and (D) 2,2'-Dithiobis(Benzothiazole) (2,2'-DBT) and from WB mushroom extract.

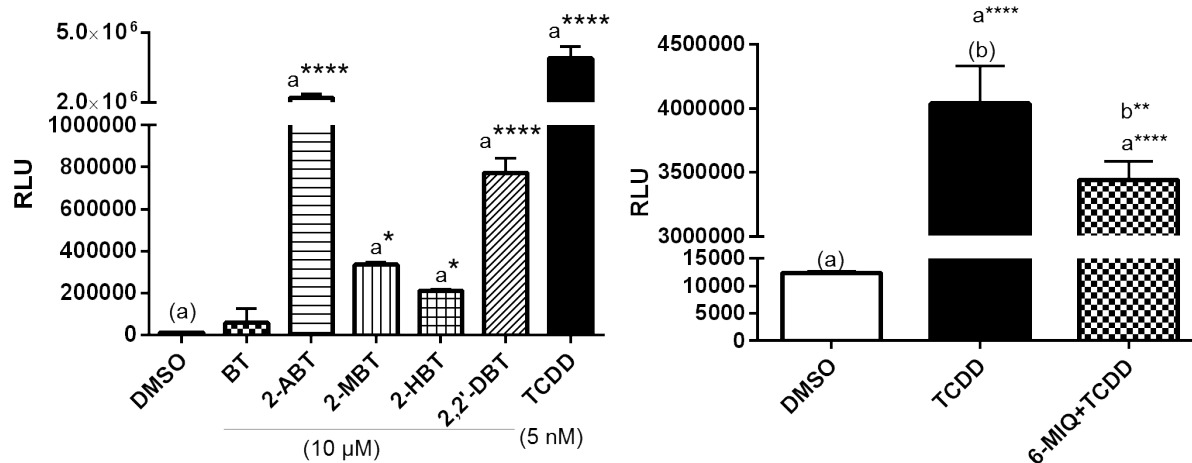

Figure S3. AHR modulator activity of 10 μM identified compounds. Hepa 1.1 reporter cells were treated with compounds alone or with 5 nM TCDD for 5 h. Values are the mean  $\pm$  S.D. of  $n = 3$  per group. \* $p < 0.05$ , \*\* $p < 0.01$ , \*\*\*\* $p < 0.0001$

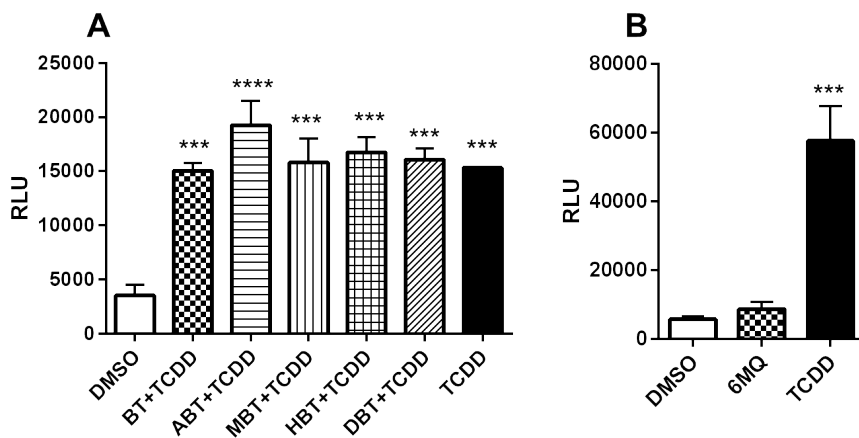

Figure S4. (A) AHR antagonistic activities of BT derivatives. HepG2 40/6 reporter cells were treated with 5 nM TCDD and 10  $\mu$ M of BT derivatives for 5 h. (B) AHR agonistic activity of 6-MIQ. HepG2 40/6 reporter cells were treated with 6-MIQ alone or 5 nM TCDD for 5 h. Values are the mean  $\pm$  S.D. of  $n = 3$  per group. \*\*\* $p < 0.001$ , \*\*\*\* $p < 0.0001$

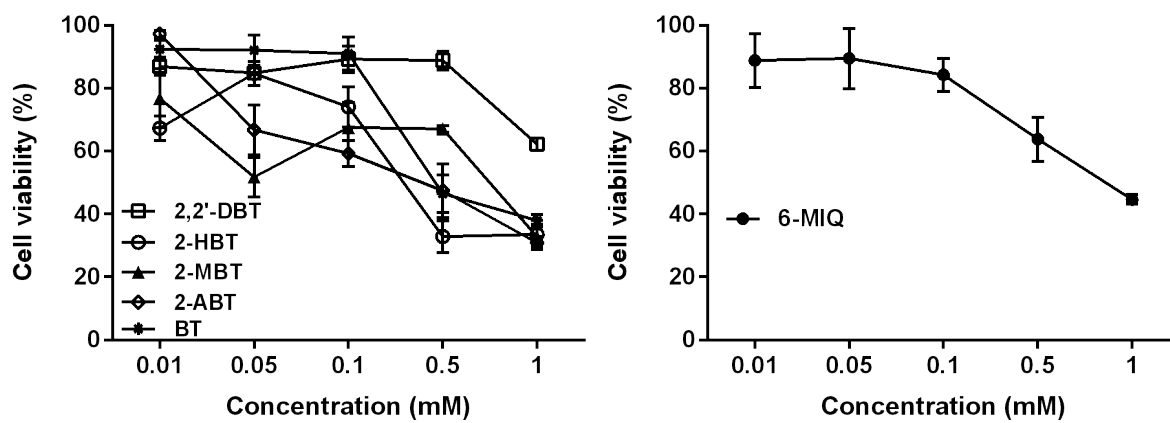

Figure S5. Percent viability of HepG2 40/6 cells measured by MTT assay after exposure for 5 hours to various concentrations of AHR modulators. Values are the mean  $\pm$  S.D. of  $n = 3$  per group.
